# Supplementary material for: Mind the gap: knowledge and practice of providers treating uncomplicated malaria at public and mission health facilities, pharmacies and drug stores in Cameroon and Nigeria
Source: PubMed Central journal article supplement — Health Policy Plan. 2014 Oct 21;30(9):1129–41. doi: 10.1093/heapol/czu118 (PMC4597040; doi:10.1093/heapol/czu118), 2014-10-21
Supplement: supp_czu118_Mind_the_Gap-Appendix_V2.pdf [file supp_czu118_Mind_the_Gap-Appendix_V2.pdf]

**Appendix A: Number of observations with missing data for each explanatory variable, by country and type of outlet**

| VARIABLE                                                                    | CAMEROON (N=405) |         |          |            | NIGERIA (N=641) |          |            |
|-----------------------------------------------------------------------------|------------------|---------|----------|------------|-----------------|----------|------------|
|                                                                             | Public           | Mission | Pharmacy | Drug Store | Public          | Pharmacy | Drug Store |
| Number of patients                                                          | N=202            | N=80    | N=52     | N=71       | N=323           | N=60     | N=258      |
| Number of patients that were linked to provider                             | N=165            | N=39    | N=32     | N=68       | N=258           | N=43     | N=211      |
| <b>Level 1: Patient-Provider Interaction</b>                                |                  |         |          |            |                 |          |            |
| Provider knew ACT was first-line antimalarial for uncomplicated malaria     | 37               | 41      | 20       | 3          | 83              | 22       | 63         |
| Provider reported having access to malaria treatment guidelines             | 37               | 41      | 20       | 3          | 66              | 18       | 47         |
| Provider had attended malaria training in past 3 years                      | 37               | 41      | 20       | 3          | 65              | 18       | 47         |
| Provider's pre-service training                                             | 37               | 41      | 20       | 3          | 65              | 17       | 47         |
| Provider stated ACT was best type of antimalarial for uncomplicated malaria | 37               | 41      | 20       | 3          | 65              | 17       | 47         |
| Provider reported the antimalarial that patients' usually ask for is ACT    | 37               | 41      | 20       | 3          | 100             | 17       | 47         |
| Patient's gender                                                            | 2                | 2       | -        | 1          | 3               | 1        | 3          |
| Patient's age group (<5years; 5+years)                                      | 5                | -       | -        | -          | 2               | -        | 3          |
| Education of person that sought treatment                                   | 3                | -       | 1        | 1          | 13              | 1        | 5          |
| Wealth quintile of patient (relative to other patients)                     | -                | -       | -        | -          | -               | -        | -          |
| Treatment was sought within 2 days following onset of fever                 | -                | -       | -        | -          | -               | -        | -          |
| First time treatment was sought (for this illness episode)                  | -                | -       | -        | -          | -               | -        | -          |
| Patient had previously taken antimalarial (for this illness episode)        | -                | -       | -        | -          | -               | -        | -          |
| Provider was told patient has diarrhoea or been vomiting                    | -                | -       | -        | -          | -               | -        | -          |
| Patient was examined by provider                                            | -                | -       | -        | -          | -               | -        | -          |
| Patient reported malaria was confirmed using microscopy                     | -                | -       | -        | -          | -               | -        | -          |
| <b>Level 2: Outlet</b>                                                      |                  |         |          |            |                 |          |            |
| Outlet had ACT in stock                                                     | -                | -       | -        | -          | -               | -        | -          |
| Outlet receives antimalarials from drug company representative              | -                | -       | 5        | 9          | -               | 13       | -          |
| Urban / rural community                                                     | -                | -       | -        | -          | -               | -        | -          |

**Appendix B: Factors associated with providers' decision to supply ACT in Cameroon (model does not include providers' stated preference for ACT)**

|                                                                        | COMPLETE CASES      |         | MULTIPLE IMPUTATION  |         |
|------------------------------------------------------------------------|---------------------|---------|----------------------|---------|
| Number of patients                                                     | 281                 |         | 405                  |         |
| Number of outlets                                                      | 84                  |         | 105                  |         |
| FIXED EFFECTS                                                          | OR (95 CI)          | P-value | OR (95 CI)           | P-value |
| <b>Level 1: Patient-Provider Interaction</b>                           |                     |         |                      |         |
| Provider knew ACT is first-line antimalarial for uncomplicated malaria | 0.47 (0.13-1.70)    | 0.252   | 0.46 (0.17-1.27)     | 0.135   |
| Provider had access to malaria guidelines                              | 0.56 (0.17-1.79)    | 0.327   | 0.98 (0.35-2.70)     | 0.961   |
| Provider had attended malaria training in past 3yrs                    | 1.40 (0.47-4.23)    | 0.546   | 1.75 (0.63-4.90)     | 0.279   |
| Provider's pre-service                                                 |                     |         |                      |         |
| Doctor                                                                 | 1.22 (0.21-7.15)    | 0.763   | 3.07 (0.58-16.22)    | 0.097   |
| Nurse / Midwife                                                        | 0.61 (0.14-2.66)    |         | 1.39 (0.34-5.79)     |         |
| Pharmacist                                                             | 0.72 (0.03-15.06)   |         | 0.20 (0.03-1.60)     |         |
| Nurse Assistant                                                        | 1.39 (0.32-6.01)    |         | 2.85 (0.68-11.97)    |         |
| None (Attendant/drug seller)                                           | 1.0                 |         | 1.0                  |         |
| Provider stated patients usually ask for ACT                           | 3.02 (1.00-9.12)    | 0.051   | 2.56 (0.98-6.69)     | 0.054   |
| Patient was male                                                       | 0.96 (0.44-2.07)    | 0.912   | 1.06 (0.57-2.00)     | 0.845   |
| Patient was under 5 years of age                                       | 2.07 (0.79-5.44)    | 0.141   | 1.50 (0.70-3.24)     | 0.301   |
| Education of person seeking treatment                                  |                     |         |                      |         |
| Tertiary                                                               | 0.45 (0.10-2.04)    | 0.522   | 0.74 (0.23-2.38)     | 0.818   |
| Secondary                                                              | 0.66 (0.26-1.68)    |         | 0.81 (0.38-1.72)     |         |
| None or Primary                                                        | 1.0                 |         | 1.0                  |         |
| Patient's wealth quintile                                              |                     |         |                      |         |
| Least Poor                                                             | 4.02 (0.71-22.58)   | 0.238   | 2.72 (0.67-11.17)    | 0.061   |
| Fourth                                                                 | 7.03 (1.34-36.88)   |         | 6.34 (1.68-23.89)    |         |
| Third                                                                  | 2.33 (0.69-7.90)    |         | 1.77 (0.63-5.00)     |         |
| Second                                                                 | 1.83 (0.66-5.02)    |         | 1.15 (0.47-2.83)     |         |
| Poorest                                                                | 1.0                 |         | 1.0                  |         |
| Treatment was sought within 2 days                                     | 1.39 (0.59-3.25)    | 0.448   | 1.10 (0.55-2.21)     | 0.781   |
| First time treatment was sought                                        | 0.28 (0.08-0.93)    | 0.037   | 0.46 (0.19-1.13)     | 0.089   |
| Patient had previously taken an antimalarial                           | 0.09 (0.02-0.42)    | 0.002   | 0.23 (0.08-0.66)     | 0.007   |
| Provider was told patient has diarrhoea or been vomiting               | 1.07 (0.32-3.62)    | 0.907   | 0.78 (0.29-2.13)     | 0.630   |
| Patient was examined by provider                                       | 0.88 (0.32-2.43)    | 0.809   | 1.11 (0.44-2.79)     | 0.826   |
| Patient had a confirmed malaria diagnosis                              | 0.28 (0.10-0.79)    | 0.017   | 0.30 (0.12-0.70)     | 0.006   |
| <b>Level 2: Outlet</b>                                                 |                     |         |                      |         |
| Type of outlet                                                         |                     |         |                      |         |
| Public                                                                 | 17.08 (2.68-108.73) | 0.006   | 148.44 (9.59-2297.3) | 0.001   |
| Mission                                                                | 4.21 (0.62-28.82)   |         | 1.48 (0.30-7.35)     |         |
| Pharmacy                                                               | 42.41 (2.22-808.51) |         | 6.09 (1.24-29.69)    |         |
| Drug Store                                                             | 1.0                 |         | 1.0                  |         |
| Outlet had ACT in stock                                                | 2.24 (0.74-6.79)    | 0.155   | 2.45 (0.82-7.35)     | 0.109   |
| Outlet usually receives antimalarial from drug company representative  | 1.79 (0.12-25.91)   | 0.668   | 1.51 (0.10-23.38)    | 0.767   |
| Outlet was in an urban community                                       | 0.74 (0.25-2.18)    | 0.586   | 0.73 (0.26-1.98)     | 0.536   |
| Constant                                                               | 1.12 (0.14-8.69)    | 0.914   | 0.55 (0.09-3.31)     | 0.514   |
| <b>RANDOM EFFECTS</b>                                                  |                     |         |                      |         |
| Residual SD                                                            | 1.02 (0.45-2.29)    |         | 1.20 (0.74-1.96)     |         |
| VPC                                                                    | 0.24                |         | 0.30                 |         |

**Appendix C: Factors associated with providers' decision to supply ACT in Nigeria (model does not include providers' stated preference for ACT)**

|                                                                        | COMPLETE CASES    |         | MULTIPLE IMPUTATION |         |
|------------------------------------------------------------------------|-------------------|---------|---------------------|---------|
| Number of patients                                                     | 423               |         | 641                 |         |
| Number of outlets                                                      | 71                |         | 93                  |         |
| FIXED EFFECTS                                                          | OR (95 CI)        | P-value | OR (95 CI)          | P-value |
| <b>Level 1: Patient-Provider Interaction</b>                           |                   |         |                     |         |
| Provider knew ACT is first-line antimalarial for uncomplicated malaria | 0.98 (0.40-2.43)  | 0.970   | 0.94 (0.46-2.20)    | 0.985   |
| Provider had access to malaria guidelines                              | 0.91 (0.27-3.09)  | 0.882   | 1.73 (0.62-4.76)    | 0.288   |
| Provider had attended malaria training in past 3yrs                    | 0.63 (0.27-1.42)  | 0.264   | 0.65 (0.31-1.38)    | 0.264   |
| Provider's pre-service training                                        |                   |         |                     |         |
| Doctor or Nurse/Midwife or Pharmacist <sup>†</sup>                     | 2.47 (0.45-13.66) | 0.417   | 1.97 (0.45-8.58)    | 0.646   |
| CHO or CHEW                                                            | 2.79 (0.60-12.87) |         | 1.63 (0.41-6.57)    |         |
| None (Attendant/drug seller)                                           | 1.0               |         | 1.0                 |         |
| Provider stated patients usually ask for ACT                           | 1.30 (0.52-3.26)  | 0.576   | 1.34 (0.60-3.00)    | 0.476   |
| Patient was male                                                       | 1.64 (0.94-2.86)  | 0.084   | 1.87 (1.20-2.93)    | 0.006   |
| Patient was under 5 years of age                                       | 3.98 (1.97-8.04)  | <0.001  | 2.77 (1.59-4.82)    | <0.001  |
| Education of person seeking treatment                                  |                   |         |                     |         |
| Tertiary                                                               | 0.97 (0.39-2.39)  | 0.842   | 1.43 (0.71-2.90)    | 0.539   |
| Secondary                                                              | 0.82 (0.38-1.76)  |         | 1.07 (0.59-1.94)    |         |
| None or Primary                                                        | 1.0               |         | 1.0                 |         |
| Patient's wealth quintile                                              |                   |         |                     |         |
| Least Poor                                                             | 1.37 (0.40-4.68)  | 0.960   | 1.41 (0.55-3.65)    | 0.963   |
| Fourth                                                                 | 1.43 (0.44-4.64)  |         | 1.33 (0.54-3.27)    |         |
| Third                                                                  | 1.56 (0.51-4.77)  |         | 1.30 (0.55-3.09)    |         |
| Second                                                                 | 1.29 (0.51-3.29)  |         | 1.27 (0.61-2.68)    |         |
| Poorest                                                                | 1.0               |         | 1.0                 |         |
| Treatment was sought within 2 days                                     | 1.76 (0.91-3.40)  | 0.091   | 1.43 (0.87-2.37)    | 0.162   |
| First time treatment was sought                                        | 0.54 (0.24-1.21)  | 0.136   | 0.48 (0.26-0.89)    | 0.020   |
| Patient had previously taken an antimalarial                           | 1.86 (0.61-5.65)  | 0.273   | 1.04 (0.44-2.46)    | 0.936   |
| Provider was told patient has diarrhoea or been vomiting               | 2.36 (1.17-4.75)  | 0.016   | 2.36 (1.38-4.05)    | 0.002   |
| Patient was examined by provider                                       | 1.13 (0.53-2.40)  | 0.754   | 1.35 (0.74-2.45)    | 0.323   |
| Patient had a confirmed malaria diagnosis                              | 0.06 (0.00-0.87)  | 0.039   | 0.24 (0.05-1.10)    | 0.066   |
| <b>Level 2: Outlet</b>                                                 |                   |         |                     |         |
| Type of outlet                                                         |                   |         |                     |         |
| Public                                                                 | 2.50 (0.44-14.29) | 0.414   | 1.22 (0.35-4.28)    | 0.655   |
| Pharmacy                                                               | 0.68 (0.12-3.85)  |         | 2.00 (0.43-9.22)    |         |
| Drug Store                                                             | 1.0               |         | 1.0                 |         |
| Outlet had ACT in stock                                                | 3.54 (1.14-10.95) | 0.029   | 3.67 (1.45-9.25)    | 0.006   |
| Outlet usually receives antimalarial from drug company representative  | 2.44 (0.56-10.62) | 0.234   | 1.21 (0.40-3.65)    | 0.733   |
| Outlet was in an urban community                                       | 2.50 (0.78-8.00)  | 0.122   | 2.18 (0.84-5.64)    | 0.110   |
| Constant                                                               | 0.01 (0.00-0.08)  | <0.001  | 0.02 (0.00-0.08)    | <0.001  |
| <b>RANDOM EFFECTS</b>                                                  |                   |         |                     |         |
| Residual SD                                                            | 1.09 (0.66-1.79)  |         | 1.03 (0.68-1.54)    |         |
| VPC                                                                    | 0.26              |         | 0.24                |         |
